# Supplementary material
Source: Springer Nature journal article supplement (https://www.springermedizin.de/resource/supplementary/13722_2013_238_MOESM2_ESM.docx/9675356)
Supplement: MOESM2 [file 9675356]

**Figure 2**

Percentages Attending 12-Step
